# Supplementary material for: Purification, Identification and Molecular Docking of Immunomodulatory Peptides from the Heads of Litopenaeus vannamei
Source: MDPI journal article supplement (doi:10.3390/foods11203309), 2022-10-21
Supplement: s1 [file s1]

**Supplementary materials:**

**Table S1. The parent protein information of the eleven immunomodulatory peptides.**

| Sequence | leading razor protein | Protein name                                                       | Gene name    | Score(MS/MS) |
|----------|-----------------------|--------------------------------------------------------------------|--------------|--------------|
| PSPFPYFT | A0A3R7NRD4            | Uncharacterized protein                                            | C7M84_017414 | 43           |
| SAGFPEGF | A0A3R7MRM8            | Uncharacterized protein                                            | C7M84_013796 | 27.121       |
| GPQGPPGH | A0A3R7N7F6            | Putative collagen alpha-2(IX) chain-like<br>isoform X2             | C7M84_002020 | 22.622       |
| PGAKCYGF | A0A423TNK8            | Putative scaffold attachment factor B2-like                        | C7M84_003253 | 17.767       |
| PGCACLPG | A0A3R7LQ73            | Uncharacterized protein                                            | C7M84_020737 | 10.185       |
| GSGGCGHW | A0A3R7QNB8            | Suppressor of cytokine signaling 5                                 | C7M84_022259 | 1.619        |
| QGF      | A0A3R7PSP3            | Dynein heavy chain, cytoplasmic                                    | C7M84_025389 | 21.978       |
| PGMR     | A0A423TWP3            | Putative histone-lysine N-methyltransferase 2C-<br>like isoform X2 | C7M84_000393 | 18.534       |
| WQR      | A0A3R7Q852            | Putative dynein heavy chain 5, axonemal-like<br>isoform X2         | C7M84_010724 | 18.31        |
| YYSF     | A0A423TWS3            | KASH domain-containing protein                                     | C7M84_000350 | 6.6306       |
| WCH      | A0A3R7PSP3            | Dynein heavy chain, cytoplasmic                                    | C7M84_025389 | 9.6433E-16   |

**Tableb S2. Immunomodulatory peptides from the heads of *Litopenaeus vannamei* gastrointestinal digestion ("/" indicates protease cleavage site) .**

| Sequence | Pepsin (pH>2)               |                   | Trpsin                      |                      |
|----------|-----------------------------|-------------------|-----------------------------|----------------------|
|          | Positions of cleavage sites | Stomach digestion | Positions of cleavage sites | Intestinal digestion |
| PSPFPYFT | 5 7                         | PSPFP/YF/T        | 5 7                         | PSPFP/YF/T           |
| SAGFPEGF | 4 7 8                       | SAGF/PEG/F        | 4 7 8                       | SAGF/PEG/F           |
| GPQGPPGH | /                           | /                 | /                           | /                    |
| QGF      | 2 3                         | QG/F              | 2 3                         | QG/F                 |
| PGMR     | /                           | /                 | /                           | /                    |
| WQR      | 1                           | W/QR              | 1                           | W/QR                 |

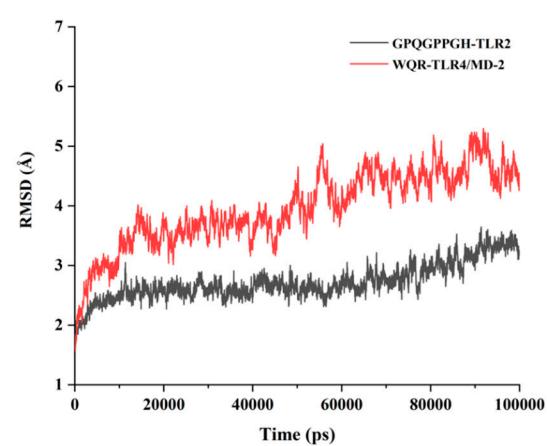

(a)

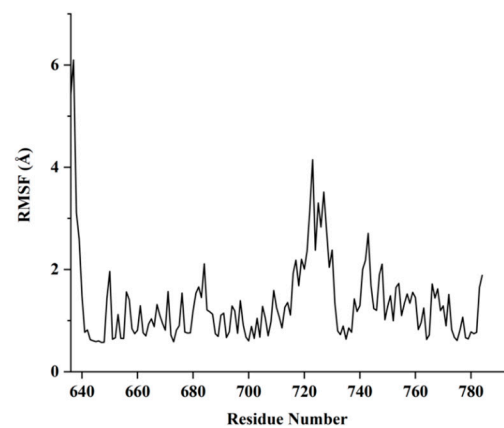

(b)

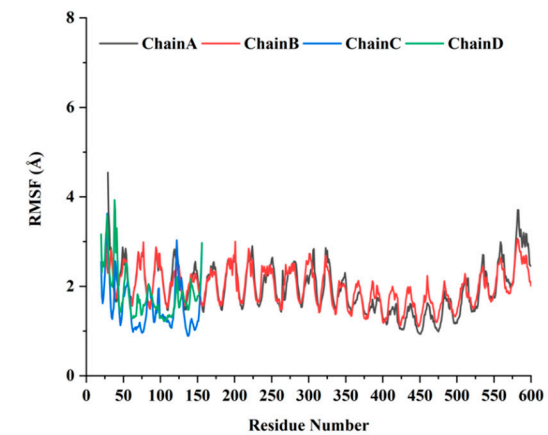

(c)

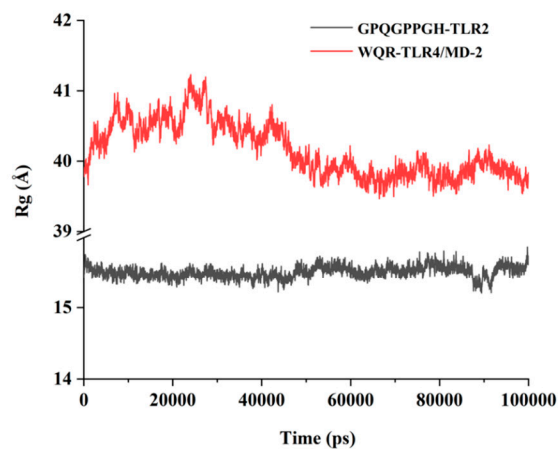

(d)

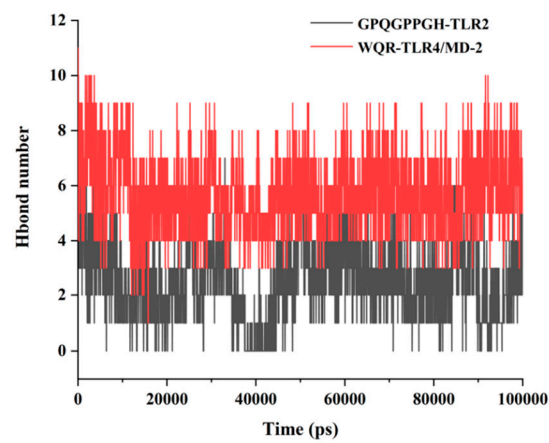

(e)

Figure S1. Graphical representation of the molecular dynamics simulation studies conducted during 100000 ps. Root mean square deviation (RMSD) (a). Root mean square fluctuation (RMSF) of GPQGPPGH-TLR2(b). RMSF of WQR-TLR4/MD-2(c). Radius of gyration (Rg) curves(d). Hbond number of the protein(e).

As can be seen from Figure S1a, the binding of two peptides to the protein had some effects on the protein structure, with the protein conformation fluctuating to some extent, but both were stable after 60,000 ps. The results indicated that the binding of the small molecule to the receptor protein resulted in a slight change in its conformation, but the overall conformation was stable. The small molecule formed a tightly bound complex with the protein.

The RMSF curves represented the fluctuations of the amino acid residues of the protein. In Figure S1b, the RMSF of GPQGPPGH-TLR2 was mostly below 2 Å, showing that this protein system remained relatively stable, especially in the segment with the sequence number of 640-710. Figure S1c shows the RMSF for the four chains in the WQR-TLR4/MD-2 system. Most of the RMSF were around 2 Å, with a minimum value of 0.9341 Å and a maximum value of 6.1328 Å, which indicated that several smaller regions of the core structural domain of the protein provided greater flexibility compared to other regions.

The Rg curves represented the compactness of the whole protein structure. It can be seen from Figure S1d that the Rg of GPQGPPGH-TLR2 and WQR-TLR4/MD-2 were stable around 15.8 Å and 40 Å, and the latter fluctuated relatively more, which might be related to more binding sites of WQR and TLR4/MD-2. However, in general, the binding of two small molecules to corresponding receptors had no significant effect on protein folding.

In molecular docking studies, hydrogen bonds had been shown to be the main binding force between immunomodulatory peptides and TLR2 and TLR4/MD-2 proteins. Figure 1e shows the number of hydrogen bonds formed between amino acid residues of peptides and receptor proteins with simulation time. GPQGPPGH-TLR2 formed 0-8 hydrogen bonds and most of the time 2-5 hydrogen bonds, while WQR-TLR4/MD-2 formed 1-11 hydrogen bonds and most of the time 4-8 hydrogen bonds, demonstrating that both of them were mainly bound by hydrogen bonding interactions.

**Table S3. Binding free energies and energy components predicted by MM/GBSA (kcal/mol).**

| Energy Component      | GPQGPPGH-TLR2 | WQR-TLR4/MD-2 |
|-----------------------|---------------|---------------|
| $\Delta G_{vdw}$      | -36.4122      | -40.2417      |
| $\Delta G_{ele}$      | -57.3621      | -89.2196      |
| $\Delta G_{polar}$    | 77.6199       | 102.2512      |
| $\Delta G_{nonpolar}$ | -4.9766       | -6.1348       |
| $\Delta G_{gas}$      | -93.7743      | -129.4613     |
| $\Delta G_{solv}$     | 72.6433       | 96.1164       |
| $\Delta G_{total}$    | -21.1311      | -33.3449      |

Notes:  $\Delta G_{vdw}$ , van der waals energy.  $\Delta G_{ele}$ , electrostatic energy.  $\Delta G_{polar}$ , polar contribution to solvation.

$\Delta G_{nonpolar}$ , non-polar contribution to solvation.  $\Delta G_{gas}$ , molecular mechanics term (energy in gas phase).  $\Delta G_{solv}$ , solvation energy.  $\Delta G_{total}$ , binding free energy.

Table S3 presents the calculated binding free energy between small molecules and proteins based on the MMGBSA equation (50-100 ns trajectories were taken for calculation). The results showed that the binding free energy of GPQGPPGH-TLR2 was -21.1311 kcal/mol.  $\Delta G_{vdw}$  (-36.4122 kcal/mol) and  $\Delta G_{ele}$  (-57.3621 kcal/mol) favored the binding, while  $\Delta G_{polar}$  (77.6199 kcal/mol) disfavored the interaction of the two. The binding free energy of WQR-TLR4/MD-2 was -33.3449 kcal/mol.  $\Delta G_{vdw}$  (-40.2417 kcal/mol) and  $\Delta G_{ele}$  (-89.2196 kcal/mol) favoured the binding, while  $\Delta G_{polar}$  (102.2512 kcal/mol) was unfavourable. The WQR-TLR4/MD-2 had a lower binding energy compared to GPQGPPGH-TLR2, which also suggested a better binding ability between WQR and the receptor protein.

Based on the findings of molecular docking, the systems GPQGPPGH-TLR2 and WQR-TLR4/MD-2 were selected for molecular dynamics simulations. The results were analysed by parameters of RMSD, RMSF, Rg and hydrogen bond formation, and it was concluded that the peptide ligands were able to form stable complexes with the target protein receptors. In addition, MM/GBSA analysis obtained the binding free energy for both complexes, which could also indicate stable binding.
